# Supplementary material
Source: publisher figshare collection journal article supplement (https://frontiersin.figshare.com/ndownloader/files/12775442)
Supplement: Supplementary file [file 12775442]

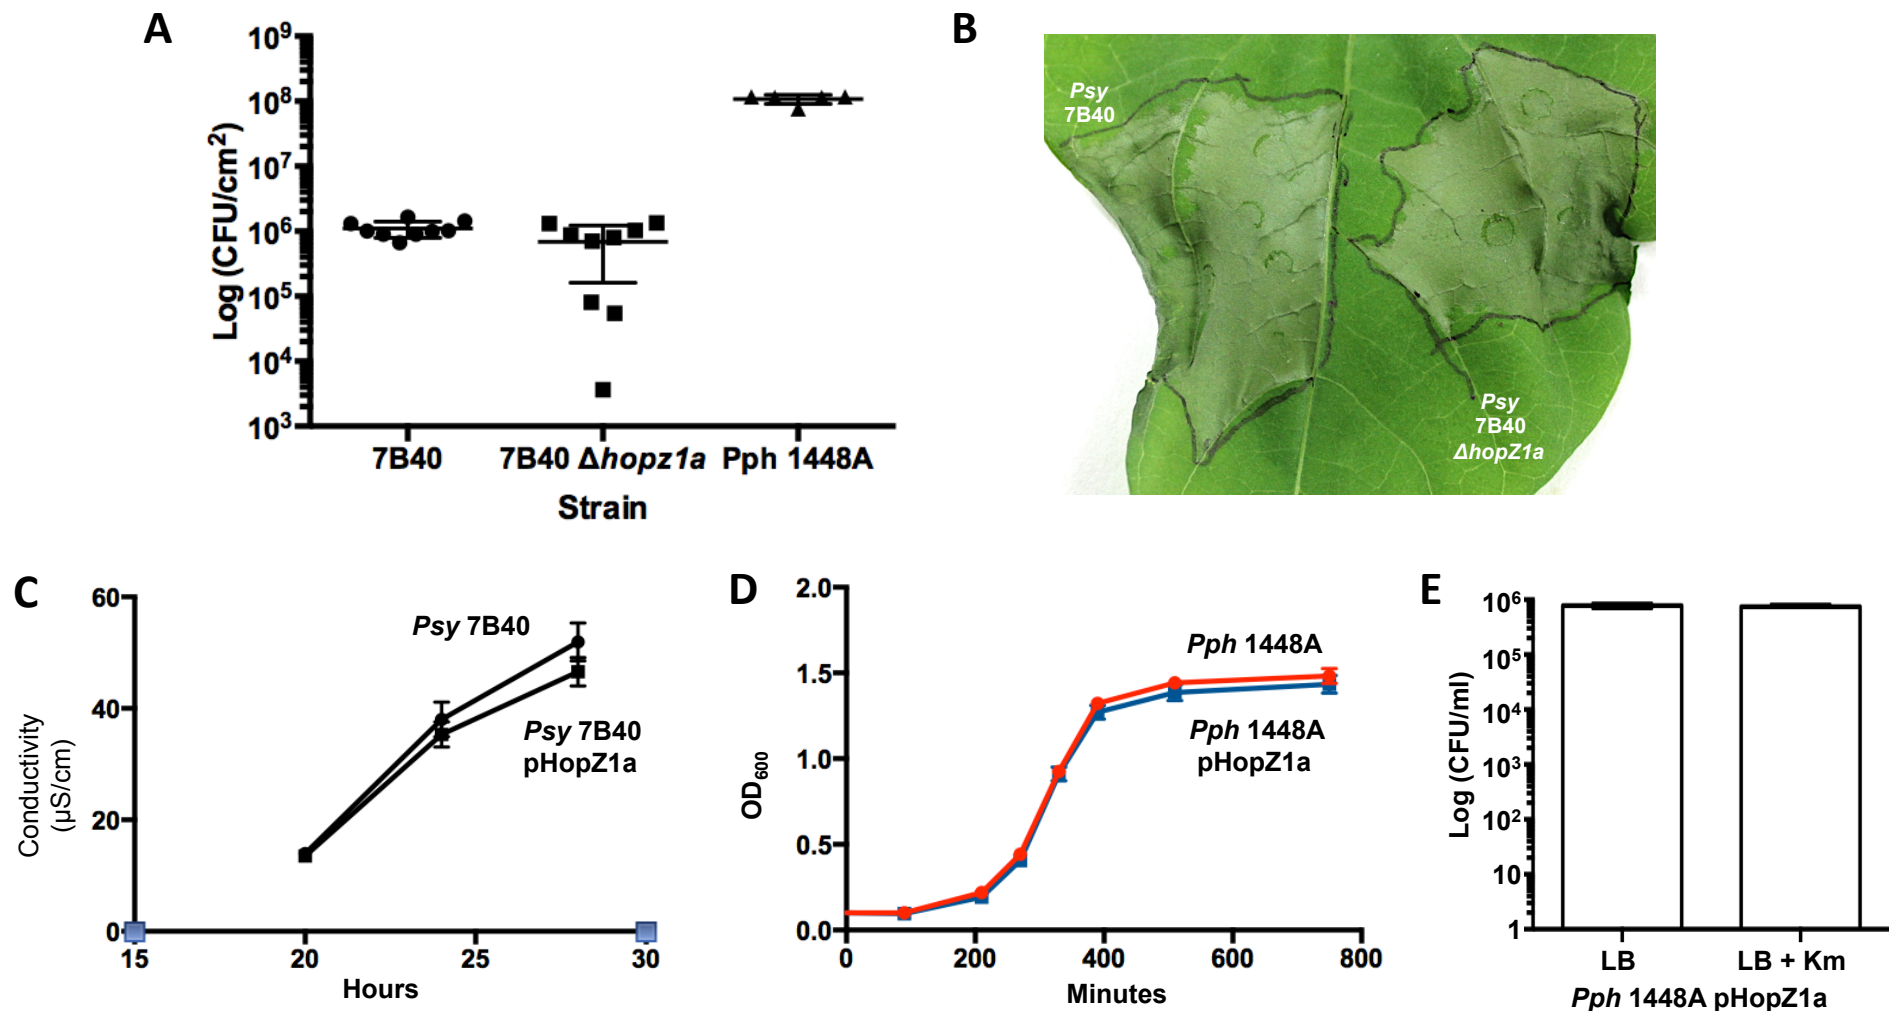

**Figure 15 HopZ1a triggers immunity in bean when delivered from a non-HopZ encoding strain.** (A) Proliferation in bean leaves 5 days post-inoculation with  $5 \times 10^5$  cfu/ml of *Psy* 7B40, *Psy* 7B40  $\Delta$ hopz1a or *Pph* 1448A corresponding to the individual populations of the competitive indexes shown in Fig. 1A. (B) . Images of the hypersensitive response to hand-infiltration of bean leaves with bacterial suspensions containing  $5 \times 10^7$  cfu/ml of *Psy* 7B40 carrying or not a  $\Delta$ hopZ1a mutation. Photographs were taken 24 hours post-inoculation. Image is representative of at least 3 inoculated leaves per strain and experiment. The experiment was repeated at least twice with similar results. (C) Conductivity assays on bean leaves carried out at different time-points post-inoculation with  $5 \times 10^7$  cfu/ml of *Psy* 7B40 carrying or not a  $\Delta$ hopZ1a mutation. The graph shows results from two independent experiments with three inoculated leaves per strain and experiment. (D) Bacterial growth curves in LB medium of *Pph* 1448A carrying or not pHopZ1a. The graph shows results obtained from two independent experiments (E) Bacteria CFU in LB-grown cultures from D, diluted down to  $5 \times 10^3$  and plated onto in LB and LB supplemented with kanamycin plates to test plasmid stability.
